# Supplementary material for: One-step heating strategy for efficient solubilization of recombinant spider silk protein from inclusion bodies
Source: BMC Biotechnol. 2020 Jul 10;20:37. doi: 10.1186/s12896-020-00630-1 (PMC7350728; doi:10.1186/s12896-020-00630-1)
Supplement: Supplementary file 1 — Additional file 1. [file 12896_2020_630_MOESM1_ESM.xlsx]

## Sheet: R20191201787_NM
	Reference	PepCount	UniquePepCount	CoverPercent	MW	PI
	FileScan	Sequence	MH+	Diff(MH+)	Charge	Rank	Score	DeltaScore	ExpectValue	Ions	Reference	DIFF_MODIFIED_CANDIDATE	PI	MissCleavage	Modification	MatchedTIC	NumProteaseTermini	Engine	Tag	Decoy
$1-1	1	186	5	0.2018	37909.8	5.17
	R20191201787_NM,2694	K.M@GPNPPQHR#.L	1092.5	1e-05	2	1	42.12	0	3.07e-06	0|0	1		9.52	0	15.994919 Oxidation (M); 43.005814 Carbamyl	0	2	MASCOT		T
	R20191201787_NM,12597	K.M@GPNPPQHRLR#.A	1361.69	0.01497	2	1	1.53	0	0.0352	0|0	1		12	1	15.994919 Oxidation (M); 43.005814 Carbamyl	0	2	MASCOT		T
	R20191201787_NM,4162	K.MGPNPPQHR#.L	1076.51	-0.00035	2	1	50.89	0	4.07e-07	0|0	1		9.52	0	43.005814 Carbamyl	0	2	MASCOT		T
	R20191201787_NM,4431	K.MGPNPPQHR#.L	1076.51	0.00205	2	1	51.04	0	3.94e-07	0|0	1		9.52	0	43.005814 Carbamyl	0	2	MASCOT		T
	R20191201787_NM,4512	K.MGPNPPQHR#.L	1076.51	0.00098	3	1	17.67	0	0.000855	0|0	1		9.52	0	43.005814 Carbamyl	0	2	MASCOT		T
	R20191201787_NM,4694	K.MGPNPPQHR#.L	1076.51	0.00021	2	1	33.16	0	2.42e-05	0|0	1		9.52	0	43.005814 Carbamyl	0	2	MASCOT		T
	R20191201787_NM,5098	K.MGPNPPQHR#.L	1076.51	-0.00191	2	1	15.01	0	0.00158	0|0	1		9.52	0	43.005814 Carbamyl	0	2	MASCOT		T
	R20191201787_NM,2090	K.M@GPNPPQHR.L	1049.49	-0.00206	2	1	47.55	0	8.79e-07	0|0	1		9.52	0	15.994919 Oxidation (M)	0	2	MASCOT		T
	R20191201787_NM,2096	K.M@GPNPPQHR.L	1049.49	-0.00068	3	1	46.19	0	1.2e-06	0|0	1		9.52	0	15.994919 Oxidation (M)	0	2	MASCOT		T
	R20191201787_NM,2320	K.M@GPNPPQHR.L	1049.49	-0.0011	2	1	66.07	0	1.24e-08	0|0	1		9.52	0	15.994919 Oxidation (M)	0	2	MASCOT		T
	R20191201787_NM,2334	K.M@GPNPPQHR.L	1049.49	-0.00035	3	1	50.34	0	4.62e-07	0|0	1		9.52	0	15.994919 Oxidation (M)	0	2	MASCOT		T
	R20191201787_NM,2727	K.M@GPNPPQHR.L	1049.49	0.00366	2	1	53.48	0	2.24e-07	0|0	1		9.52	0	15.994919 Oxidation (M)	0	2	MASCOT		T
	R20191201787_NM,10994	K.M@GPNPPQHRLR.A	1318.68	-0.00746	3	1	1.49	0	0.0355	0|0	1		12	1	15.994919 Oxidation (M)	0	2	MASCOT		T
	R20191201787_NM,2483	K.MGPNPPQHR.L	1033.5	-0.00028	2	1	47.78	0	8.34e-07	0|0	1		9.52	0		0	2	MASCOT		T
	R20191201787_NM,2519	K.MGPNPPQHR.L	1033.5	-0.00083	3	1	35.02	0	1.57e-05	0|0	1		9.52	0		0	2	MASCOT		T
	R20191201787_NM,2712	K.MGPNPPQHR.L	1033.5	-0.00028	2	1	51.79	0	3.31e-07	0|0	1		9.52	0		0	2	MASCOT		T
	R20191201787_NM,2740	K.MGPNPPQHR.L	1033.5	-0.00038	3	1	39.6	0	5.48e-06	0|0	1		9.52	0		0	2	MASCOT		T
	R20191201787_NM,2906	K.MGPNPPQHR.L	1033.5	-0.0001	2	1	38.31	0	7.38e-06	0|0	1		9.52	0		0	2	MASCOT		T
	R20191201787_NM,2944	K.MGPNPPQHR.L	1033.5	0.00022	3	1	45.6	0	1.38e-06	0|0	1		9.52	0		0	2	MASCOT		T
	R20191201787_NM,3201	K.MGPNPPQHR.L	1033.5	-2e-05	2	1	40.91	0	4.05e-06	0|0	1		9.52	0		0	2	MASCOT		T
	R20191201787_NM,3299	K.MGPNPPQHR.L	1033.5	-0.00137	3	1	45.79	0	1.32e-06	0|0	1		9.52	0		0	2	MASCOT		T
	R20191201787_NM,3486	K.MGPNPPQHR.L	1033.5	0.00136	2	1	47.65	0	8.59e-07	0|0	1		9.52	0		0	2	MASCOT		T
	R20191201787_NM,3591	K.MGPNPPQHR.L	1033.5	-0.00065	3	1	35.27	0	1.49e-05	0|0	1		9.52	0		0	2	MASCOT		T
	R20191201787_NM,3829	K.MGPNPPQHR.L	1033.5	0.0001	2	1	58.45	0	7.14e-08	0|0	1		9.52	0		0	2	MASCOT		T
	R20191201787_NM,3889	K.MGPNPPQHR.L	1033.5	-0.00017	3	1	44.99	0	1.58e-06	0|0	1		9.52	0		0	2	MASCOT		T
	R20191201787_NM,4083	K.MGPNPPQHR.L	1033.5	-0.0004	2	1	51.28	0	3.72e-07	0|0	1		9.52	0		0	2	MASCOT		T
	R20191201787_NM,4139	K.MGPNPPQHR.L	1033.5	-0.00041	3	1	41.83	0	3.28e-06	0|0	1		9.52	0		0	2	MASCOT		T
	R20191201787_NM,4342	K.MGPNPPQHR.L	1033.5	-0.0002	2	1	51.26	0	3.74e-07	0|0	1		9.52	0		0	2	MASCOT		T
	R20191201787_NM,4404	K.MGPNPPQHR.L	1033.5	-0.00116	3	1	39.49	0	5.62e-06	0|0	1		9.52	0		0	2	MASCOT		T
	R20191201787_NM,4610	K.MGPNPPQHR.L	1033.5	0.0003	2	1	49.12	0	6.12e-07	0|0	1		9.52	0		0	2	MASCOT		T
	R20191201787_NM,4689	K.MGPNPPQHR.L	1033.5	0.00016	3	1	48.33	0	7.34e-07	0|0	1		9.52	0		0	2	MASCOT		T
	R20191201787_NM,4887	K.MGPNPPQHR.L	1033.5	-0.00042	2	1	39.22	0	5.98e-06	0|0	1		9.52	0		0	2	MASCOT		T
	R20191201787_NM,5000	K.MGPNPPQHR.L	1033.5	-0.00032	3	1	45.19	0	1.51e-06	0|0	1		9.52	0		0	2	MASCOT		T
	R20191201787_NM,5184	K.MGPNPPQHR.L	1033.5	-0.0006	2	1	42.39	0	2.88e-06	0|0	1		9.52	0		0	2	MASCOT		T
	R20191201787_NM,5403	K.MGPNPPQHR.L	1033.5	-0.00029	3	1	35.33	0	1.47e-05	0|0	1		9.52	0		0	2	MASCOT		T
	R20191201787_NM,5446	K.MGPNPPQHR.L	1033.5	0.0004	2	1	30.26	0	4.71e-05	0|0	1		9.52	0		0	2	MASCOT		T
	R20191201787_NM,5790	K.MGPNPPQHR.L	1033.5	0.00388	2	1	26.95	0	0.000101	0|0	1		9.52	0		0	2	MASCOT		T
	R20191201787_NM,6349	K.MGPNPPQHR.L	1033.5	0.00085	3	1	18.57	0	0.000695	0|0	1		9.52	0		0	2	MASCOT		T
	R20191201787_NM,6595	K.MGPNPPQHR.L	1033.5	0.0019	3	1	38.93	0	6.4e-06	0|0	1		9.52	0		0	2	MASCOT		T
	R20191201787_NM,6825	K.MGPNPPQHR.L	1033.5	-0.00054	2	1	29.87	0	5.15e-05	0|0	1		9.52	0		0	2	MASCOT		T
	R20191201787_NM,7108	K.MGPNPPQHR.L	1033.5	0.00043	3	1	28.17	0	7.62e-05	0|0	1		9.52	0		0	2	MASCOT		T
	R20191201787_NM,7118	K.MGPNPPQHR.L	1033.5	-6e-05	2	1	29.65	0	5.42e-05	0|0	1		9.52	0		0	2	MASCOT		T
	R20191201787_NM,7402	K.MGPNPPQHR.L	1033.5	0.00054	2	1	27.02	0	9.93e-05	0|0	1		9.52	0		0	2	MASCOT		T
	R20191201787_NM,7501	K.MGPNPPQHR.L	1033.5	-0.00074	3	1	27.41	0	9.08e-05	0|0	1		9.52	0		0	2	MASCOT		T
	R20191201787_NM,7671	K.MGPNPPQHR.L	1033.5	-0.00196	2	1	16.3	0	0.00117	0|0	1		9.52	0		0	2	MASCOT		T
	R20191201787_NM,7788	K.MGPNPPQHR.L	1033.5	-0.00203	3	1	35.58	0	1.38e-05	0|0	1		9.52	0		0	2	MASCOT		T
	R20191201787_NM,8091	K.MGPNPPQHR.L	1033.5	0.00061	3	1	37.48	0	8.93e-06	0|0	1		9.52	0		0	2	MASCOT		T
	R20191201787_NM,8296	K.MGPNPPQHR.L	1033.5	0.00188	2	1	20.72	0	0.000424	0|0	1		9.52	0		0	2	MASCOT		T
	R20191201787_NM,8514	K.MGPNPPQHR.L	1033.5	0.00055	3	1	45.72	0	1.34e-06	0|0	1		9.52	0		0	2	MASCOT		T
	R20191201787_NM,8582	K.MGPNPPQHR.L	1033.5	0.0015	2	1	46.17	0	1.21e-06	0|0	1		9.52	0		0	2	MASCOT		T
	R20191201787_NM,8846	K.MGPNPPQHR.L	1033.5	-0.00014	3	1	35.18	0	1.52e-05	0|0	1		9.52	0		0	2	MASCOT		T
	R20191201787_NM,8877	K.MGPNPPQHR.L	1033.5	0.00228	2	1	21.52	0	0.000352	0|0	1		9.52	0		0	2	MASCOT		T
	R20191201787_NM,9263	K.MGPNPPQHR.L	1033.5	0.00043	3	1	40.16	0	4.82e-06	0|0	1		9.52	0		0	2	MASCOT		T
	R20191201787_NM,9385	K.MGPNPPQHR.L	1033.5	0.00068	2	1	31.13	0	3.85e-05	0|0	1		9.52	0		0	2	MASCOT		T
	R20191201787_NM,9564	K.MGPNPPQHR.L	1033.5	0.00067	3	1	45.2	0	1.51e-06	0|0	1		9.52	0		0	2	MASCOT		T
	R20191201787_NM,9690	K.MGPNPPQHR.L	1033.5	-0.00126	2	1	34.45	0	1.79e-05	0|0	1		9.52	0		0	2	MASCOT		T
	R20191201787_NM,9855	K.MGPNPPQHR.L	1033.5	-0.00032	3	1	34.8	0	1.66e-05	0|0	1		9.52	0		0	2	MASCOT		T
	R20191201787_NM,10127	K.MGPNPPQHR.L	1033.5	-0.00262	2	1	38.94	0	6.38e-06	0|0	1		9.52	0		0	2	MASCOT		T
	R20191201787_NM,10166	K.MGPNPPQHR.L	1033.5	-0.0002	3	1	36.99	0	1e-05	0|0	1		9.52	0		0	2	MASCOT		T
	R20191201787_NM,10474	K.MGPNPPQHR.L	1033.5	0.00022	3	1	48.77	0	6.64e-07	0|0	1		9.52	0		0	2	MASCOT		T
	R20191201787_NM,10761	K.MGPNPPQHR.L	1033.5	-0.0002	3	1	46.4	0	1.15e-06	0|0	1		9.52	0		0	2	MASCOT		T
	R20191201787_NM,10925	K.MGPNPPQHR.L	1033.5	-0.00078	2	1	21.14	0	0.000385	0|0	1		9.52	0		0	2	MASCOT		T
	R20191201787_NM,11076	K.MGPNPPQHR.L	1033.5	0.001	3	1	18.26	0	0.000746	0|0	1		9.52	0		0	2	MASCOT		T
	R20191201787_NM,11529	K.MGPNPPQHR.L	1033.5	-0.00084	2	1	19.61	0	0.000547	0|0	1		9.52	0		0	2	MASCOT		T
	R20191201787_NM,11530	K.MGPNPPQHR.L	1033.5	0.00145	3	1	31.51	0	3.53e-05	0|0	1		9.52	0		0	2	MASCOT		T
	R20191201787_NM,11820	K.MGPNPPQHR.L	1033.5	-0.00044	2	1	33.42	0	2.27e-05	0|0	1		9.52	0		0	2	MASCOT		T
	R20191201787_NM,11821	K.MGPNPPQHR.L	1033.5	0.00028	3	1	40.96	0	4.01e-06	0|0	1		9.52	0		0	2	MASCOT		T
	R20191201787_NM,12118	K.MGPNPPQHR.L	1033.5	0.00031	3	1	46	0	1.26e-06	0|0	1		9.52	0		0	2	MASCOT		T
	R20191201787_NM,12505	K.MGPNPPQHR.L	1033.5	-0.00164	3	1	28.45	0	7.14e-05	0|0	1		9.52	0		0	2	MASCOT		T
	R20191201787_NM,12826	K.MGPNPPQHR.L	1033.5	-0.00035	3	1	45.05	0	1.56e-06	0|0	1		9.52	0		0	2	MASCOT		T
	R20191201787_NM,12897	K.MGPNPPQHR.L	1033.5	0.00052	2	1	51.81	0	3.3e-07	0|0	1		9.52	0		0	2	MASCOT		T
	R20191201787_NM,13133	K.MGPNPPQHR.L	1033.5	-0.00014	3	1	40.68	0	4.28e-06	0|0	1		9.52	0		0	2	MASCOT		T
	R20191201787_NM,13190	K.MGPNPPQHR.L	1033.5	0.00258	2	1	16.37	0	0.00115	0|0	1		9.52	0		0	2	MASCOT		T
	R20191201787_NM,13412	K.MGPNPPQHR.L	1033.5	-2e-05	3	1	38.76	0	6.65e-06	0|0	1		9.52	0		0	2	MASCOT		T
	R20191201787_NM,13592	K.MGPNPPQHR.L	1033.5	0.00026	2	1	34.06	0	1.96e-05	0|0	1		9.52	0		0	2	MASCOT		T
	R20191201787_NM,13717	K.MGPNPPQHR.L	1033.5	-0.00047	3	1	30.8	0	4.16e-05	0|0	1		9.52	0		0	2	MASCOT		T
	R20191201787_NM,14027	K.MGPNPPQHR.L	1033.5	0.00058	3	1	36.62	0	1.09e-05	0|0	1		9.52	0		0	2	MASCOT		T
	R20191201787_NM,14269	K.MGPNPPQHR.L	1033.5	-0.00066	2	1	16.2	0	0.0012	0|0	1		9.52	0		0	2	MASCOT		T
	R20191201787_NM,14359	K.MGPNPPQHR.L	1033.5	-0.00074	3	1	31.15	0	3.84e-05	0|0	1		9.52	0		0	2	MASCOT		T
	R20191201787_NM,14575	K.MGPNPPQHR.L	1033.5	-0.00132	2	1	10.63	0	0.00432	0|0	1		9.52	0		0	2	MASCOT		T
	R20191201787_NM,14667	K.MGPNPPQHR.L	1033.5	-0.00044	3	1	43.05	0	2.48e-06	0|0	1		9.52	0		0	2	MASCOT		T
	R20191201787_NM,14956	K.MGPNPPQHR.L	1033.5	-0.00017	3	1	40.93	0	4.04e-06	0|0	1		9.52	0		0	2	MASCOT		T
	R20191201787_NM,15014	K.MGPNPPQHR.L	1033.5	-0.00118	2	1	19.16	0	0.000607	0|0	1		9.52	0		0	2	MASCOT		T
	R20191201787_NM,15256	K.MGPNPPQHR.L	1033.5	-0.00044	3	1	36.41	0	1.14e-05	0|0	1		9.52	0		0	2	MASCOT		T
	R20191201787_NM,15552	K.MGPNPPQHR.L	1033.5	7e-05	3	1	32.22	0	3e-05	0|0	1		9.52	0		0	2	MASCOT		T
	R20191201787_NM,15875	K.MGPNPPQHR.L	1033.5	-0.00083	3	1	39.15	0	6.08e-06	0|0	1		9.52	0		0	2	MASCOT		T
	R20191201787_NM,15956	K.MGPNPPQHR.L	1033.5	-0.00058	2	1	36.74	0	1.06e-05	0|0	1		9.52	0		0	2	MASCOT		T
	R20191201787_NM,16197	K.MGPNPPQHR.L	1033.5	-0.0002	3	1	51.78	0	3.32e-07	0|0	1		9.52	0		0	2	MASCOT		T
	R20191201787_NM,16270	K.MGPNPPQHR.L	1033.5	0.00056	2	1	33.61	0	2.18e-05	0|0	1		9.52	0		0	2	MASCOT		T
	R20191201787_NM,16496	K.MGPNPPQHR.L	1033.5	0.00052	3	1	41.91	0	3.22e-06	0|0	1		9.52	0		0	2	MASCOT		T
	R20191201787_NM,16574	K.MGPNPPQHR.L	1033.5	-0.00032	2	1	15.54	0	0.0014	0|0	1		9.52	0		0	2	MASCOT		T
	R20191201787_NM,16807	K.MGPNPPQHR.L	1033.5	0.00025	3	1	48.89	0	6.46e-07	0|0	1		9.52	0		0	2	MASCOT		T
	R20191201787_NM,17121	K.MGPNPPQHR.L	1033.5	0.00049	3	1	48.63	0	6.85e-07	0|0	1		9.52	0		0	2	MASCOT		T
	R20191201787_NM,17438	K.MGPNPPQHR.L	1033.5	0.00013	3	1	46.11	0	1.22e-06	0|0	1		9.52	0		0	2	MASCOT		T
	R20191201787_NM,17440	K.MGPNPPQHR.L	1033.5	0.0006	2	1	20.22	0	0.000475	0|0	1		9.52	0		0	2	MASCOT		T
	R20191201787_NM,17752	K.MGPNPPQHR.L	1033.5	-0.00012	2	1	22.55	0	0.000278	0|0	1		9.52	0		0	2	MASCOT		T
	R20191201787_NM,17753	K.MGPNPPQHR.L	1033.5	-0.0005	3	1	46.33	0	1.16e-06	0|0	1		9.52	0		0	2	MASCOT		T
	R20191201787_NM,18067	K.MGPNPPQHR.L	1033.5	0.00016	3	1	33.42	0	2.27e-05	0|0	1		9.52	0		0	2	MASCOT		T
	R20191201787_NM,18152	K.MGPNPPQHR.L	1033.5	0.00052	2	1	12.11	0	0.00308	0|0	1		9.52	0		0	2	MASCOT		T
	R20191201787_NM,18375	K.MGPNPPQHR.L	1033.5	0.00115	3	1	41.68	0	3.4e-06	0|0	1		9.52	0		0	2	MASCOT		T
	R20191201787_NM,18692	K.MGPNPPQHR.L	1033.5	-0.00065	3	1	46	0	1.26e-06	0|0	1		9.52	0		0	2	MASCOT		T
	R20191201787_NM,18785	K.MGPNPPQHR.L	1033.5	-0.0014	2	1	16.24	0	0.00119	0|0	1		9.52	0		0	2	MASCOT		T
	R20191201787_NM,19009	K.MGPNPPQHR.L	1033.5	0.00058	3	1	38.98	0	6.32e-06	0|0	1		9.52	0		0	2	MASCOT		T
	R20191201787_NM,19096	K.MGPNPPQHR.L	1033.5	-0.00038	2	1	22.41	0	0.000287	0|0	1		9.52	0		0	2	MASCOT		T
	R20191201787_NM,19322	K.MGPNPPQHR.L	1033.5	-0.00014	3	1	29.38	0	5.77e-05	0|0	1		9.52	0		0	2	MASCOT		T
	R20191201787_NM,19428	K.MGPNPPQHR.L	1033.5	-0.00068	2	1	20.19	0	0.000479	0|0	1		9.52	0		0	2	MASCOT		T
	R20191201787_NM,19655	K.MGPNPPQHR.L	1033.5	0.00109	3	1	32.84	0	2.6e-05	0|0	1		9.52	0		0	2	MASCOT		T
	R20191201787_NM,19755	K.MGPNPPQHR.L	1033.5	-0.00108	2	1	22.72	0	0.000267	0|0	1		9.52	0		0	2	MASCOT		T
	R20191201787_NM,19973	K.MGPNPPQHR.L	1033.5	0.00013	3	1	41.65	0	3.42e-06	0|0	1		9.52	0		0	2	MASCOT		T
	R20191201787_NM,20058	K.MGPNPPQHR.L	1033.5	0.0006	2	1	26.08	0	0.000123	0|0	1		9.52	0		0	2	MASCOT		T
	R20191201787_NM,20284	K.MGPNPPQHR.L	1033.5	-0.00014	3	1	23.58	0	0.000219	0|0	1		9.52	0		0	2	MASCOT		T
	R20191201787_NM,20369	K.MGPNPPQHR.L	1033.5	0.0007	2	1	18.53	0	0.000701	0|0	1		9.52	0		0	2	MASCOT		T
	R20191201787_NM,20579	K.MGPNPPQHR.L	1033.5	0.0013	3	1	33.48	0	2.24e-05	0|0	1		9.52	0		0	2	MASCOT		T
	R20191201787_NM,20854	K.MGPNPPQHR.L	1033.5	0.00032	2	1	33.56	0	2.2e-05	0|0	1		9.52	0		0	2	MASCOT		T
	R20191201787_NM,20878	K.MGPNPPQHR.L	1033.5	-0.00029	3	1	48.95	0	6.37e-07	0|0	1		9.52	0		0	2	MASCOT		T
	R20191201787_NM,21189	K.MGPNPPQHR.L	1033.5	-0.00089	3	1	41.92	0	3.21e-06	0|0	1		9.52	0		0	2	MASCOT		T
	R20191201787_NM,21488	K.MGPNPPQHR.L	1033.5	0.00028	2	1	23.79	0	0.000209	0|0	1		9.52	0		0	2	MASCOT		T
	R20191201787_NM,21507	K.MGPNPPQHR.L	1033.5	0.00043	3	1	51.94	0	3.2e-07	0|0	1		9.52	0		0	2	MASCOT		T
	R20191201787_NM,21801	K.MGPNPPQHR.L	1033.5	0.00026	2	1	40.04	0	4.95e-06	0|0	1		9.52	0		0	2	MASCOT		T
	R20191201787_NM,21822	K.MGPNPPQHR.L	1033.5	-0.00035	3	1	36.73	0	1.06e-05	0|0	1		9.52	0		0	2	MASCOT		T
	R20191201787_NM,22103	K.MGPNPPQHR.L	1033.5	-0.00332	2	1	20.3	0	0.000467	0|0	1		9.52	0		0	2	MASCOT		T
	R20191201787_NM,22188	K.MGPNPPQHR.L	1033.5	0.00016	3	1	37.32	0	9.27e-06	0|0	1		9.52	0		0	2	MASCOT		T
	R20191201787_NM,22417	K.MGPNPPQHR.L	1033.5	-0.00152	2	1	30.14	0	4.84e-05	0|0	1		9.52	0		0	2	MASCOT		T
	R20191201787_NM,22507	K.MGPNPPQHR.L	1033.5	-0.00161	3	1	17.26	0	0.00094	0|0	1		9.52	0		0	2	MASCOT		T
	R20191201787_NM,22817	K.MGPNPPQHR.L	1033.5	0.00058	3	1	39.71	0	5.35e-06	0|0	1		9.52	0		0	2	MASCOT		T
	R20191201787_NM,22866	K.MGPNPPQHR.L	1033.5	0.00018	2	1	32.97	0	2.52e-05	0|0	1		9.52	0		0	2	MASCOT		T
	R20191201787_NM,23141	K.MGPNPPQHR.L	1033.5	-5e-05	3	1	35.02	0	1.57e-05	0|0	1		9.52	0		0	2	MASCOT		T
	R20191201787_NM,23182	K.MGPNPPQHR.L	1033.5	-0.00072	2	1	23.86	0	0.000206	0|0	1		9.52	0		0	2	MASCOT		T
	R20191201787_NM,23455	K.MGPNPPQHR.L	1033.5	0.00175	3	1	35.18	0	1.52e-05	0|0	1		9.52	0		0	2	MASCOT		T
	R20191201787_NM,23490	K.MGPNPPQHR.L	1033.5	0.00168	2	1	10.11	0	0.00487	0|0	1		9.52	0		0	2	MASCOT		T
	R20191201787_NM,23774	K.MGPNPPQHR.L	1033.5	4e-05	3	1	34.79	0	1.66e-05	0|0	1		9.52	0		0	2	MASCOT		T
	R20191201787_NM,23788	K.MGPNPPQHR.L	1033.5	-0.00012	2	1	22.05	0	0.000312	0|0	1		9.52	0		0	2	MASCOT		T
	R20191201787_NM,24090	K.MGPNPPQHR.L	1033.5	0.00112	3	1	27.24	0	9.44e-05	0|0	1		9.52	0		0	2	MASCOT		T
	R20191201787_NM,24091	K.MGPNPPQHR.L	1033.5	0.00098	2	1	24.36	0	0.000183	0|0	1		9.52	0		0	2	MASCOT		T
	R20191201787_NM,24389	K.MGPNPPQHR.L	1033.5	-0.003	2	1	10.14	0	0.00484	0|0	1		9.52	0		0	2	MASCOT		T
	R20191201787_NM,24390	K.MGPNPPQHR.L	1033.5	0.00085	3	1	36.8	0	1.04e-05	0|0	1		9.52	0		0	2	MASCOT		T
	R20191201787_NM,24709	K.MGPNPPQHR.L	1033.5	-0.0021	2	1	21.46	0	0.000357	0|0	1		9.52	0		0	2	MASCOT		T
	R20191201787_NM,24712	K.MGPNPPQHR.L	1033.5	0.00103	3	1	43.26	0	2.36e-06	0|0	1		9.52	0		0	2	MASCOT		T
	R20191201787_NM,25028	K.MGPNPPQHR.L	1033.5	0.00046	3	1	21.4	0	0.000362	0|0	1		9.52	0		0	2	MASCOT		T
	R20191201787_NM,25030	K.MGPNPPQHR.L	1033.5	-0.00224	2	1	21.26	0	0.000374	0|0	1		9.52	0		0	2	MASCOT		T
	R20191201787_NM,25334	K.MGPNPPQHR.L	1033.5	0.00055	3	1	40.12	0	4.86e-06	0|0	1		9.52	0		0	2	MASCOT		T
	R20191201787_NM,25512	K.MGPNPPQHR.L	1033.5	-0.00042	2	1	20.59	0	0.000436	0|0	1		9.52	0		0	2	MASCOT		T
	R20191201787_NM,25622	K.MGPNPPQHR.L	1033.5	-0.00065	3	1	40.37	0	4.59e-06	0|0	1		9.52	0		0	2	MASCOT		T
	R20191201787_NM,25810	K.MGPNPPQHR.L	1033.5	0.00052	2	1	13.45	0	0.00226	0|0	1		9.52	0		0	2	MASCOT		T
	R20191201787_NM,25936	K.MGPNPPQHR.L	1033.5	0.00043	3	1	37.26	0	9.4e-06	0|0	1		9.52	0		0	2	MASCOT		T
	R20191201787_NM,26110	K.MGPNPPQHR.L	1033.5	0.00128	2	1	19.33	0	0.000583	0|0	1		9.52	0		0	2	MASCOT		T
	R20191201787_NM,26224	K.MGPNPPQHR.L	1033.5	0.00085	3	1	34.43	0	1.8e-05	0|0	1		9.52	0		0	2	MASCOT		T
	R20191201787_NM,26407	K.MGPNPPQHR.L	1033.5	-0.0003	2	1	11.98	0	0.00317	0|0	1		9.52	0		0	2	MASCOT		T
	R20191201787_NM,26567	K.MGPNPPQHR.L	1033.5	0.00232	3	1	30.52	0	4.44e-05	0|0	1		9.52	0		0	2	MASCOT		T
	R20191201787_NM,26720	K.MGPNPPQHR.L	1033.5	4e-05	2	1	28.04	0	7.85e-05	0|0	1		9.52	0		0	2	MASCOT		T
	R20191201787_NM,27237	K.MGPNPPQHR.L	1033.5	0.00055	3	1	42.47	0	2.83e-06	0|0	1		9.52	0		0	2	MASCOT		T
	R20191201787_NM,27747	K.MGPNPPQHR.L	1033.5	0.00034	3	1	27.15	0	9.64e-05	0|0	1		9.52	0		0	2	MASCOT		T
	R20191201787_NM,27879	K.MGPNPPQHR.L	1033.5	-0.0005	2	1	25.14	0	0.000153	0|0	1		9.52	0		0	2	MASCOT		T
	R20191201787_NM,28178	K.MGPNPPQHR.L	1033.5	0.00031	3	1	22.56	0	0.000277	0|0	1		9.52	0		0	2	MASCOT		T
	R20191201787_NM,28206	K.MGPNPPQHR.L	1033.5	-0.00044	2	1	26.59	0	0.00011	0|0	1		9.52	0		0	2	MASCOT		T
	R20191201787_NM,28490	K.MGPNPPQHR.L	1033.5	0.00073	3	1	34.2	0	1.9e-05	0|0	1		9.52	0		0	2	MASCOT		T
	R20191201787_NM,28557	K.MGPNPPQHR.L	1033.5	0.00012	2	1	10.53	0	0.00443	0|0	1		9.52	0		0	2	MASCOT		T
	R20191201787_NM,28816	K.MGPNPPQHR.L	1033.5	0.00049	3	1	30.77	0	4.19e-05	0|0	1		9.52	0		0	2	MASCOT		T
	R20191201787_NM,28875	K.MGPNPPQHR.L	1033.5	0.00048	2	1	34.93	0	1.61e-05	0|0	1		9.52	0		0	2	MASCOT		T
	R20191201787_NM,29186	K.MGPNPPQHR.L	1033.5	0.00079	3	1	34.04	0	1.97e-05	0|0	1		9.52	0		0	2	MASCOT		T
	R20191201787_NM,29188	K.MGPNPPQHR.L	1033.5	4e-05	2	1	21.09	0	0.000389	0|0	1		9.52	0		0	2	MASCOT		T
	R20191201787_NM,29497	K.MGPNPPQHR.L	1033.5	-8e-05	3	1	27.24	0	9.44e-05	0|0	1		9.52	0		0	2	MASCOT		T
	R20191201787_NM,29515	K.MGPNPPQHR.L	1033.5	0.00024	2	1	31.46	0	3.57e-05	0|0	1		9.52	0		0	2	MASCOT		T
	R20191201787_NM,29797	K.MGPNPPQHR.L	1033.5	0.00169	3	1	24.49	0	0.000178	0|0	1		9.52	0		0	2	MASCOT		T
	R20191201787_NM,29809	K.MGPNPPQHR.L	1033.5	0.0005	2	1	30.92	0	4.05e-05	0|0	1		9.52	0		0	2	MASCOT		T
	R20191201787_NM,30067	K.MGPNPPQHR.L	1033.5	-0.00035	3	1	21.17	0	0.000382	0|0	1		9.52	0		0	2	MASCOT		T
	R20191201787_NM,30079	K.MGPNPPQHR.L	1033.5	0.00012	2	1	11.78	0	0.00332	0|0	1		9.52	0		0	2	MASCOT		T
	R20191201787_NM,30326	K.MGPNPPQHR.L	1033.5	-0.00095	3	1	35.03	0	1.57e-05	0|0	1		9.52	0		0	2	MASCOT		T
	R20191201787_NM,30341	K.MGPNPPQHR.L	1033.5	-0.00016	2	1	39.73	0	5.32e-06	0|0	1		9.52	0		0	2	MASCOT		T
	R20191201787_NM,30582	K.MGPNPPQHR.L	1033.5	0.00012	2	1	34.4	0	1.82e-05	0|0	1		9.52	0		0	2	MASCOT		T
	R20191201787_NM,30812	K.MGPNPPQHR.L	1033.5	0.0002	2	1	39.4	0	5.74e-06	0|0	1		9.52	0		0	2	MASCOT		T
	R20191201787_NM,30885	K.MGPNPPQHR.L	1033.5	-0.00017	3	1	15.75	0	0.00133	0|0	1		9.52	0		0	2	MASCOT		T
	R20191201787_NM,31054	K.MGPNPPQHR.L	1033.5	-0.00044	2	1	13.99	0	0.002	0|0	1		9.52	0		0	2	MASCOT		T
	R20191201787_NM,31298	K.MGPNPPQHR.L	1033.5	-0.00017	3	1	4.71	0	0.0169	0|0	1		9.52	0		0	2	MASCOT		T
	R20191201787_NM,31532	K.MGPNPPQHR.L	1033.5	0	2	1	13.36	0	0.00231	0|0	1		9.52	0		0	2	MASCOT		T
	R20191201787_NM,14421	R.GADSAGAAAGYGGGVGTGTGSSAGYGR#.G	2275	-0.00281	3	1	62.26	0	2.97e-08	0|0	1		5.84	0	43.005814 Carbamyl	0	2	MASCOT		T
	R20191201787_NM,15539	R.GADSAGAAAGYGGGVGTGTGSSAGYGR#.G	2275	-0.00431	3	1	2.86	0	0.0259	0|0	1		5.84	0	43.005814 Carbamyl	0	2	MASCOT		T
	R20191201787_NM,4723	R.GAGGYGGGAGDGAGAGAGAL#EHHHHHH.-	2458.05	0.00142	3	1	16.95	0	0.00101	0|0	1		6.27	0	43.005814 Carbamyl	0	2	MASCOT		T
	R20191201787_NM,29351	R.ESMM@QATGSVDNAFTNEVMQLVK.M	2546.16	-0.00162	3	1	53.72	0	2.12e-07	0|0	1		4.14	0	15.994919 Oxidation (M)	0	2	MASCOT		T
	R20191201787_NM,28319	R.ESMMQATGSVDNAFTNEVM@QLVK.M	2546.16	0.00618	3	1	45.53	0	1.4e-06	0|0	1		4.14	0	15.994919 Oxidation (M)	0	2	MASCOT		T
	R20191201787_NM,14005	R.GADSAGAAAGYGGGVGTGTGSSAGYGR.G	2231.99	0.00028	3	1	67.7	0	8.49e-09	0|0	1		5.84	0		0	2	MASCOT		T
	R20191201787_NM,30074	R.GADSAGAAAGYGGGVGTGTGSSAGYGR.G	2231.99	-0.00062	3	1	39.6	0	5.48e-06	0|0	1		5.84	0		0	2	MASCOT		T
	R20191201787_NM,2942	R.GAGGYGGGAGDGAGAGAGALEHHHHHH.-	2415.05	0.00061	3	1	47.48	0	8.93e-07	0|0	1		6.27	0		0	2	MASCOT		T
	R20191201787_NM,3799	R.GAGGYGGGAGDGAGAGAGALEHHHHHH.-	2415.05	0.00121	3	1	36.21	0	1.2e-05	0|0	1		6.27	0		0	2	MASCOT		T
	R20191201787_NM,4320	R.GAGGYGGGAGDGAGAGAGALEHHHHHH.-	2415.05	0.00061	3	1	28.28	0	7.43e-05	0|0	1		6.27	0		0	2	MASCOT		T
	R20191201787_NM,5172	R.GAGGYGGGAGDGAGAGAGALEHHHHHH.-	2415.05	0.00181	3	1	4.66	0	0.0171	0|0	1		6.27	0		0	2	MASCOT		T
----- summary -----
Total protein	: 1
Total protein group	: 1
UniPepCount	ProteinGroupCount	Percent	ProteinCount	Percent
5	1	1	1	1
